# Supplementary material for: Substrate mediated reduction of copper-amyloid-β complex in Alzheimer’s disease
Source: Royal Society of Chemistry journal article supplement (doi:10.1039/b803911a), 2008-01-01
Supplement: b803911a.pdf [file b803911a.pdf]

## Supplementary information

### Substrate Mediated Reduction of Copper-Amyloid- $\beta$ Complex of Alzheimer's Disease

Victor A. Streltsov\* and Joseph N. Varghese

CSIRO Molecular and Health Technologies, Parkville, VIC 3052, Australia

**Sample preparation-** The A $\beta$ (1-16) peptide was obtained from Auspep Pty Ltd. The A $\beta$ -Cu<sup>2+</sup> complex samples were freshly prepared before the data collections. Known quantities of A $\beta$ (1-16) peptides were dissolved in common isotonic phosphate saline (PBS). Freshly prepared solution of CuCl<sub>2</sub> was added to peptide solutions to the concentration ratio 1:1 of metal to peptide. Prepared A $\beta$ (1-16)-Cu<sup>2+</sup> complexes were mixed them with 10-fold molar ratio of substrates dissolved in water except cholesterol which was dissolved in chloroform and added with 5-fold molar ratio. The A $\beta$ /Cu concentration was 1.1mM in the reference oxidized A $\beta$ -Cu<sup>2+</sup> sample and about 2.2.mM in all other samples with substrates. Finally, 17% of glycerol was added to the sample solution as a cryoprotectant. Glycerol is an accepted cryoprotectant in protein crystallography, EPR and XAS spectroscopy. Immediately after the preparation the samples were injected into 230  $\mu$ L Teflon cells made with two Kapton windows (approx. 4 x 25 mm), rapidly frozen in liquid nitrogen.

**X-ray absorption data collection-** A series of Cu *K*-edge (8980.4 eV) X-ray absorption spectrum scans were obtained from the sample in a fluorescence mode at low T using a helium displax cryostat. The experiments were conducted at the Pacific Northwest Consortium Collaborative Access Team (PNC-CAT) 20BM bending magnet beamline at the Advanced Photon Source (APS) of Argonne National Laboratories, USA. The beamline optical setup was equipped with a double crystal Si(111) monochromator and a 5 milliradian rhodium coated harmonic-rejection mirror. To increase sensitivity with millimolar concentration solutions a 12-element liquid-N<sub>2</sub>-cooled Ge detector was used. The beam size was (ver x horiz) 1 x 15 mm. The incident X-ray intensity was monitored using an ionization chamber. The stability of the monochromator energy was checked for all spectra by simultaneously accumulating by transmittance a Cu foil spectrum. The energy was calibrated with reference to the lowest energy inflection point of a Cu foil spectrum which was assumed to be 8980.4 eV. The enlarged XANES regions of 8078-8980 eV (A), 8980-8986 eV (B), and 8995-9055 eV (C) of normalized absorption amplitude vs energy E are shown in Figure SI below.

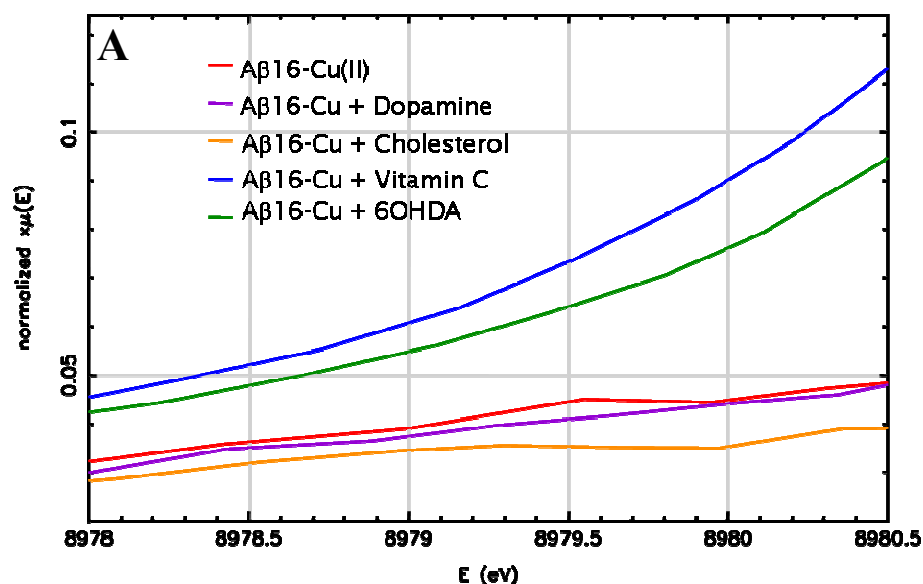

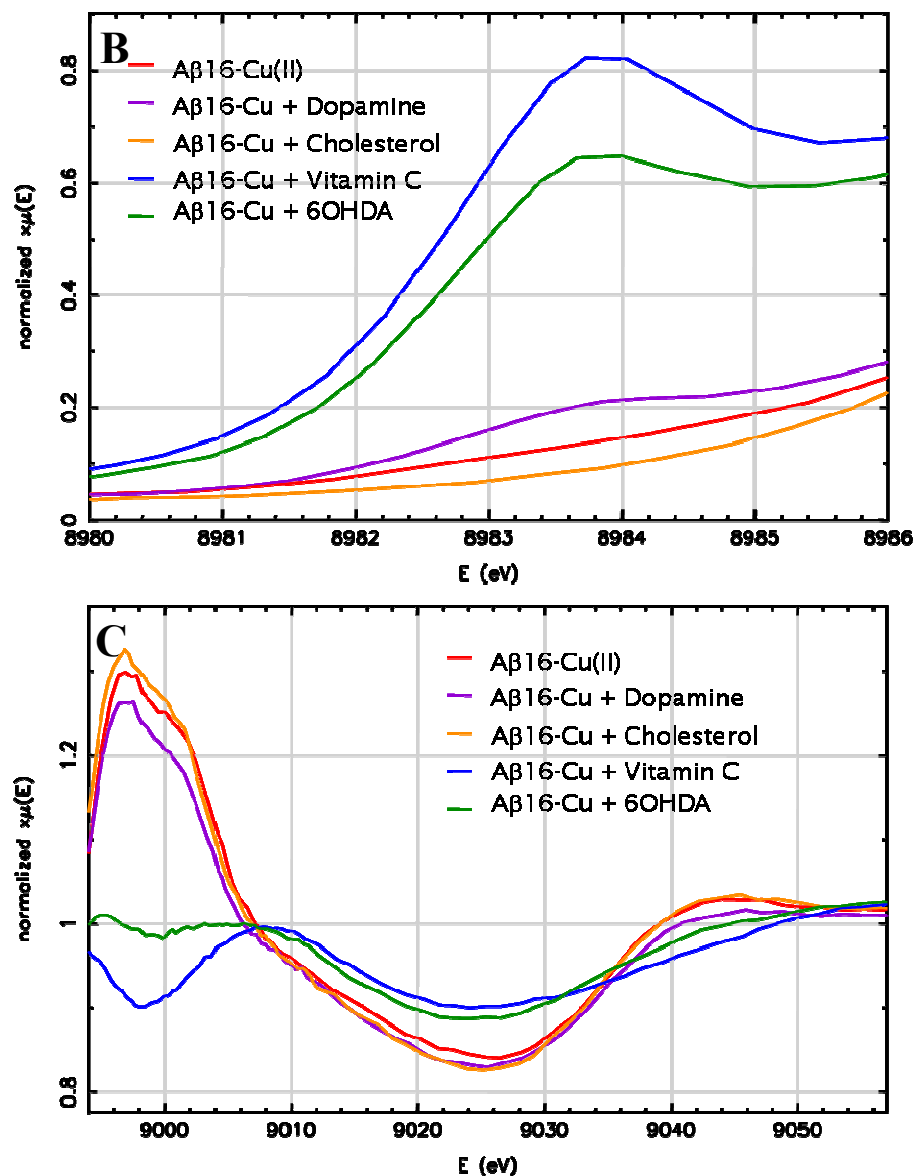

**Figure S1.** The XANES regions (8078-8980 eV (A), 8980-8986 eV (B) and 8995-9055 eV (C)) of normalized absorption amplitude vs energy  $E$  for oxidized ( $A\beta(1-16)-Cu^{2+}$  - red, with dopamine - purple and with cholesterol - orange) and reduced ( $A\beta(1-16)-Cu^{1+}$  with vitamin C - blue and with 6-hydroxyldopamine (6-OHDA) - green) complexes.
